# Supplementary material
Source: MDPI journal article supplement (https://www.mdpi.com/2073-4395/10/2/253)

KAS360-22

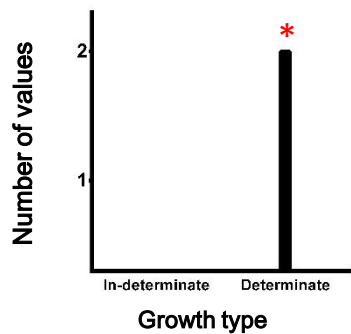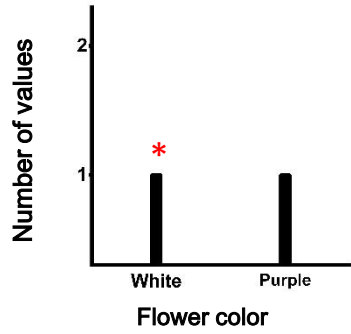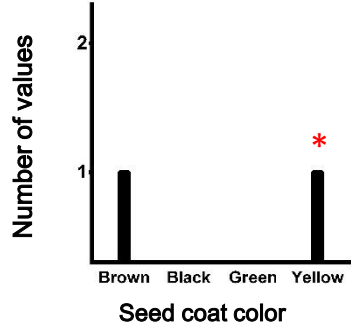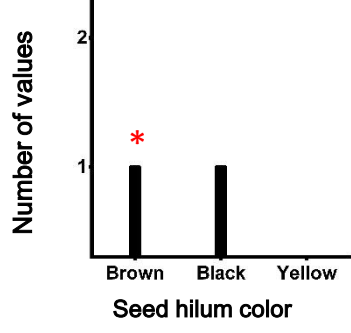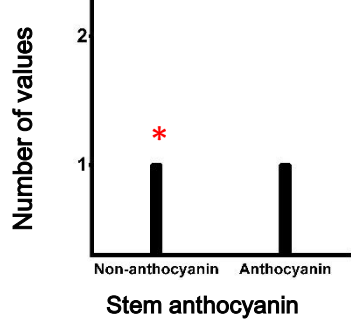

94Seori

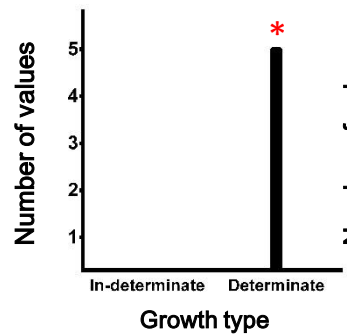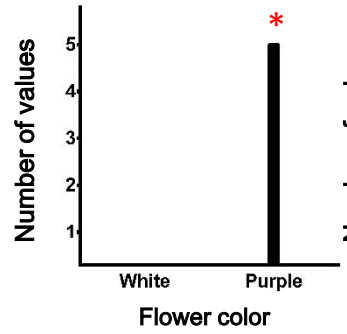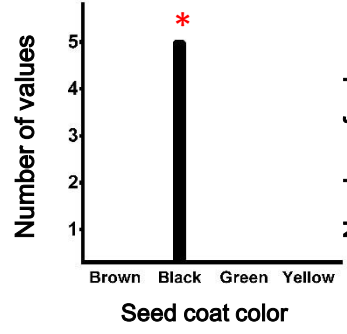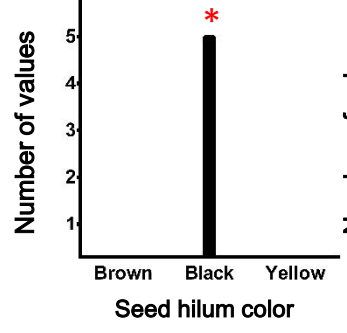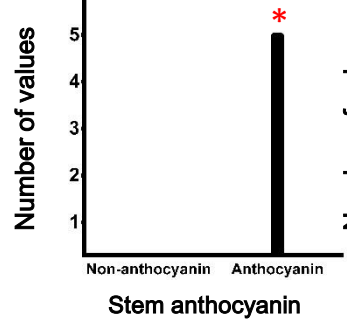

BangSa

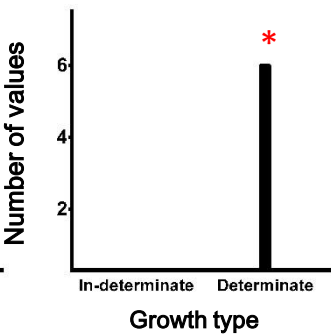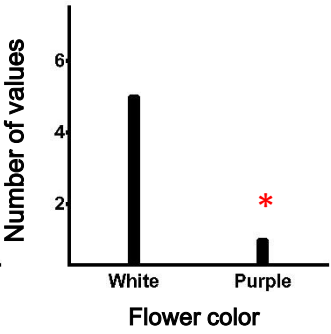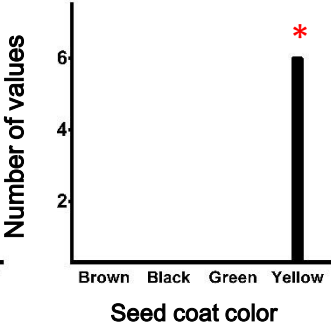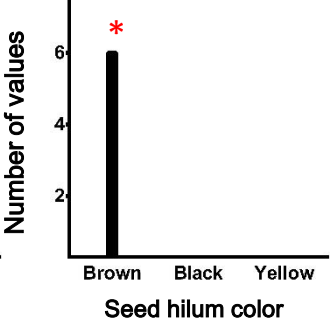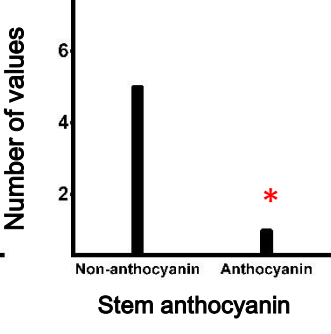

PalDal

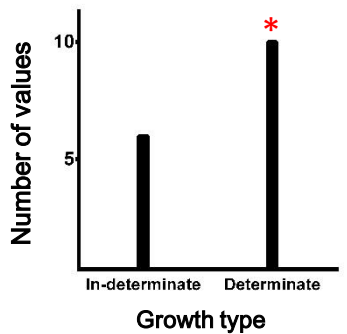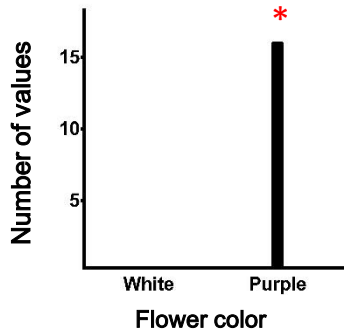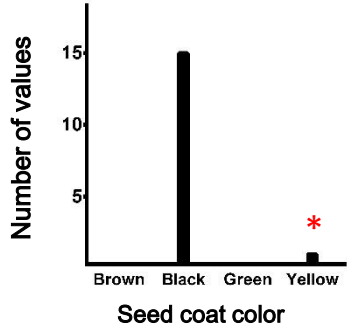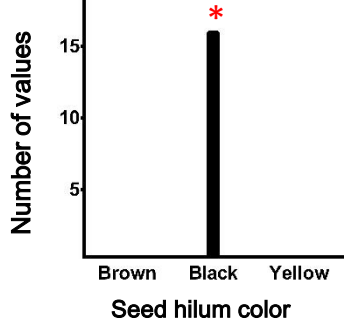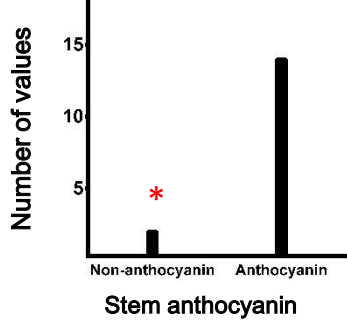

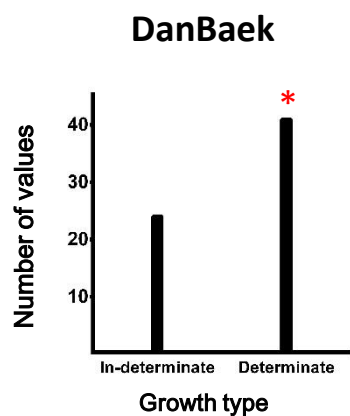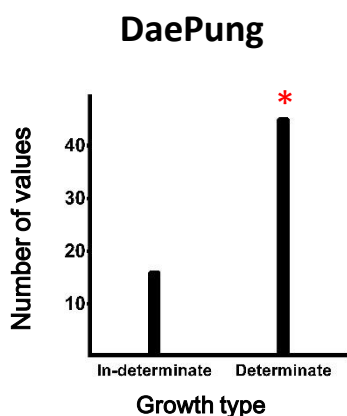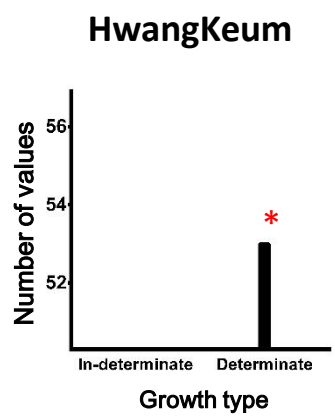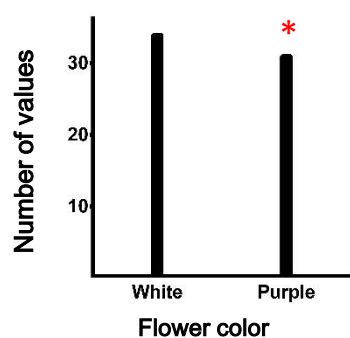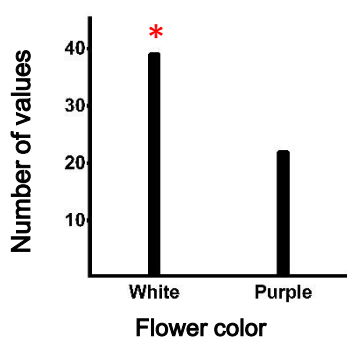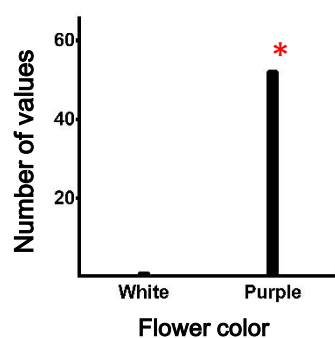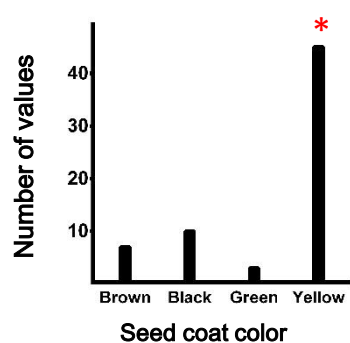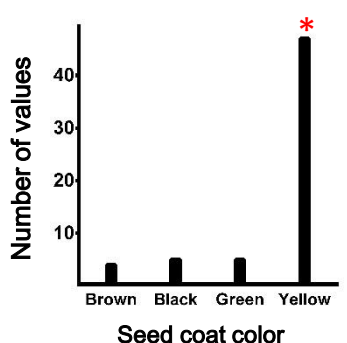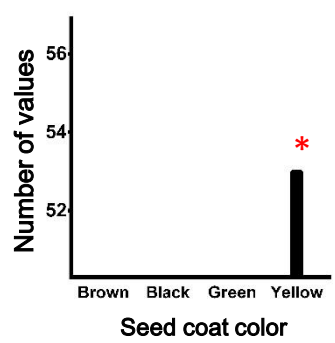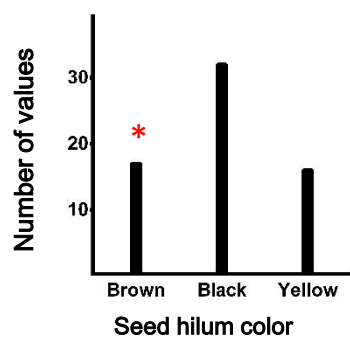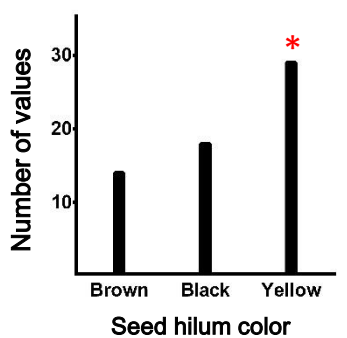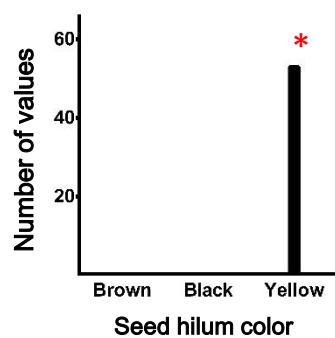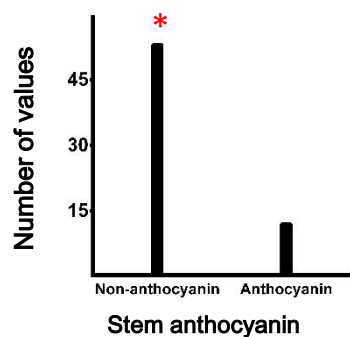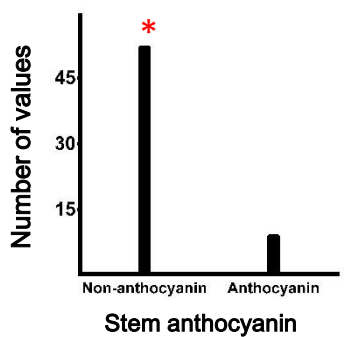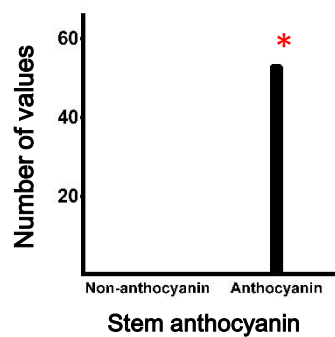

Supplement: s1 [file s1]

$$\text{DeltaK} = \text{mean}(|L''(K)|) / \text{sd}(L(K))$$

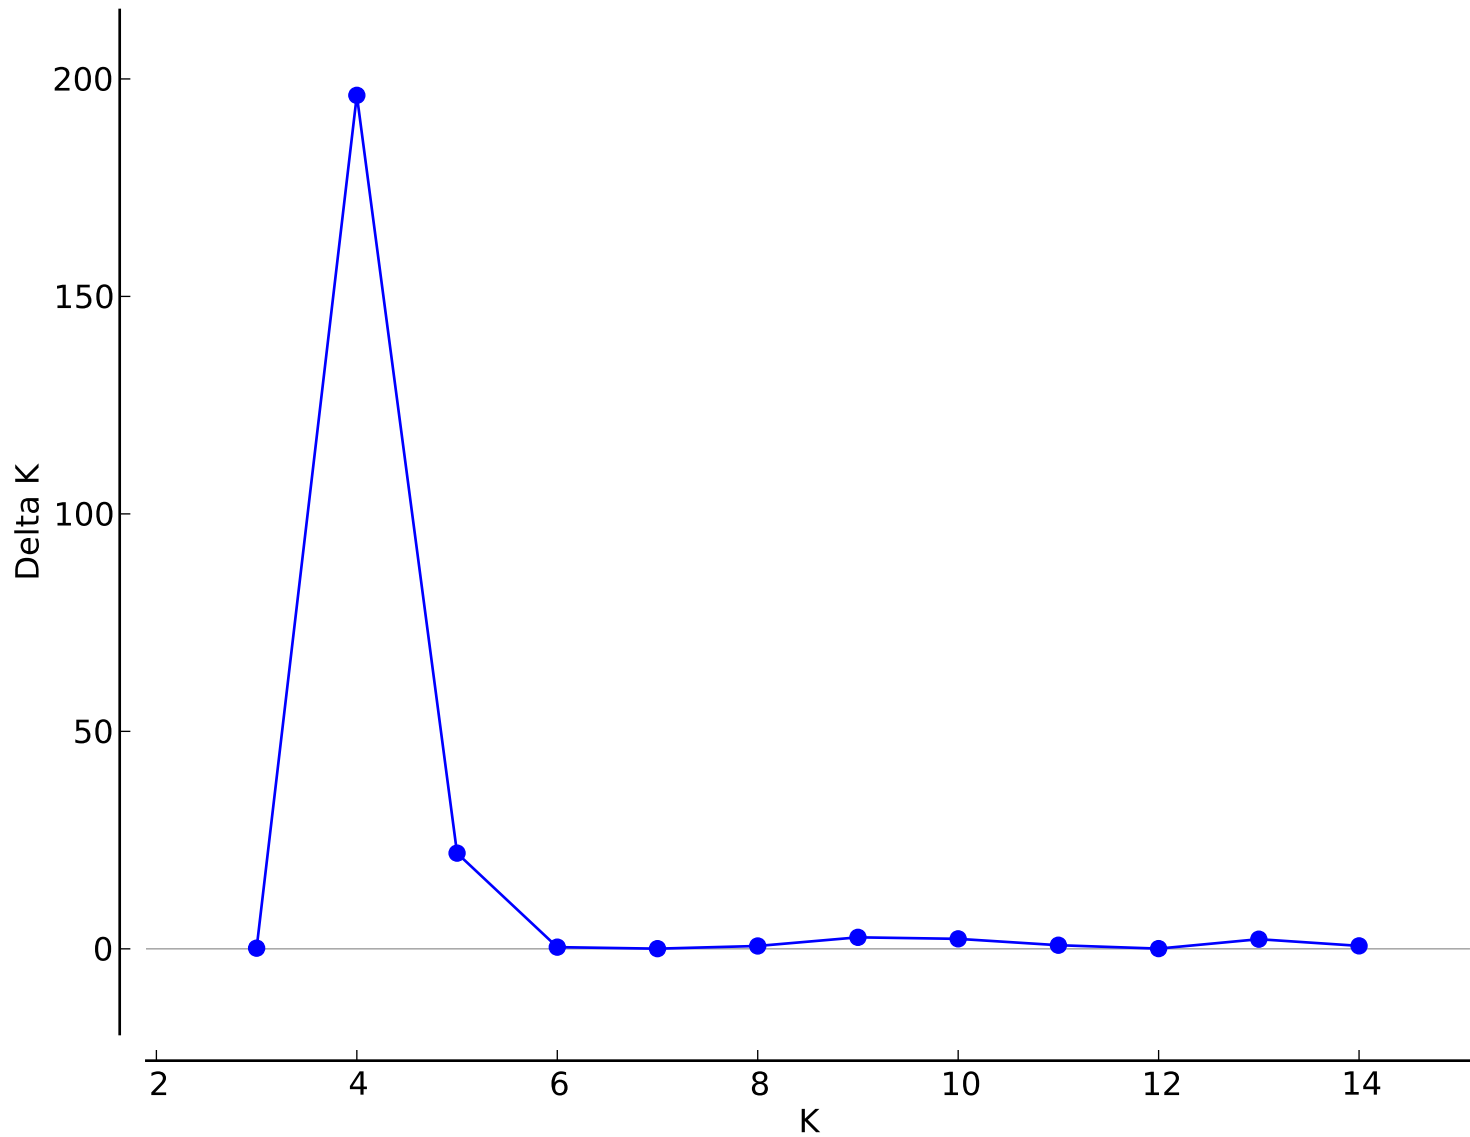

Supplement: s1 [file s1]
